31 **Abstract**

32 **Introduction**

33 Despite global and national efforts in place for the prevention and control of Hepatitis B, there  
34 remains a gap in access to hepatitis B prevention services such as testing and vaccination.  
35 Nonetheless, there is limited evidence of the geospatial distribution of Hepatitis B services.  
36 This study established the geospatial distribution of HBV vaccination services in Wakiso  
37 District, Uganda.

38 **Materials and methods**

39 A cross-sectional quantitative descriptive study was conducted among 55 healthcare facilities  
40 including 6 hospitals, and 49 primary care facilities in Wakiso district. Data were collected  
41 using the KoboCollect application. Quantitative data were analysed using STATA 14.0. A chi-  
42 square test was performed to establish the relationship between healthcare facility  
43 characteristics and the availability of hepatitis B services. ArcGIS (version 10.1) was used for  
44 analysis of geospatial data.

45 **Results**

46 The hepatitis B vaccine was available in only 27.3 % (15) of the facilities, and 60% (33) had  
47 testing services. Receipt of the hepatitis B vaccine doses in the last 12 months was associated  
48 with the level of healthcare facility ( $p \leq 0.001$ ) and location ( $p = 0.030$ ). Availability of the  
49 Hepatitis B vaccines at the time of the survey was associated with the level of healthcare facility  
50 ( $p = 0.002$ ) and location ( $p = 0.010$ ). Availability of hepatitis B testing services was associated  
51 with level of healthcare facility ( $p = 0.031$ ), ownership ( $p \leq 0.001$ ) and location ( $p = 0.010$ ).  
52 Healthcare facilities offering vaccination and testing services were mostly in urban healthcare  
53 facilities, and close to Kampala, Uganda's capital.

54 **Conclusion**

55 Hepatitis B services were sub-optimal across all healthcare facility levels, locations, and  
56 ownership. The majority of the hepatitis B prevention services were provided in urban settings,  
57 close to major towns, municipalities, and the city. This calls a extension of hepatitis B  
58 prevention services to rural, public and PNFP healthcare facilities.

59

60 **Key words**

61 Geospatial distribution, hepatitis B testing, hepatitis B vaccination, infection prevention and  
62 control, Uganda

63

## 64 **Introduction**

65 Hepatitis B virus (HBV) infection remains a serious global public health concern, affecting  
66 over 257 million people (1, 2). Low-and-middle income countries (LMICs) bare the greatest  
67 burden of HBV infection, accounting for almost all (96%) individuals living with the disease  
68 (1). The incidence of HBV infection is 9.2 times higher in LMICs than high-income countries  
69 (1). The WHO African region has the second highest prevalence of HBV infection (6.1%)  
70 while America has the lowest (0.7%) (1). The prevalence of HBV infection in Uganda is 4.1%  
71 among adults and 0.6% among children. It is highest in the mid-north (4.6%) and lowest in the  
72 south-western region (0.8%) of the country (3). Despite the high public health burden of HBV  
73 infection in LMICs including Uganda, access to testing, vaccination, treatment and  
74 management services remains suboptimal (1). Nonetheless, a large burden of chronic infections  
75 requires increased access to testing and treatment services (4, 5).

76 HBV is an infection of the liver, transmitted through contact with blood or other body fluids of  
77 an infected person. The risk of chronic HBV infection and co-infection is high among under-  
78 fives, health care providers, and people living with HIV/AIDS respectively (1, 6). A large  
79 proportion of HBV cases are carriers who may remain asymptomatic for a long time, thus  
80 increasing their risk of liver cirrhosis, hepatocellular carcinoma and early death (1). Access to  
81 vaccination and screening/testing is critical in the prevention and management, and elimination  
82 of HBV infection by 2030 (1, 7). Availability of testing services is key in the diagnosis of  
83 chronic HBV, and consequently linkage of patients to appropriate care and treatment, which  
84 eventually delays progression of liver disease (4, 5, 7). Additionally, availability of testing  
85 services provides an avenue for counselling on risky behaviours, provision of prevention  
86 commodities such as sterile needles and syringes, and vaccination (4, 5). Vaccination reduces  
87 the risk of HBV infection, and co-infection with Hepatitis D virus, which is known to  
88 aggravate the outcome of HBV infection (1, 8, 9).

89 Although evidence on global and regional coverage of hepatitis B vaccination among adults is  
90 scarce, high-income countries with vaccination data reveal low rates (10). Limited access to  
91 testing and vaccination services among adults born before the HBV vaccination era increases  
92 their risk of infection and death (1, 5). Available data on vaccination coverage among groups  
93 at an elevated risk of the HBV infection in low-income countries reveal suboptimal rates (11-  
94 14).

95 There have been various strategies at global, regional and national level aimed at reducing  
96 disparities in access to hepatitis B prevention, care and treatment services (15). In 2016, the  
97 World Health Organisation (WHO) developed a global health sector strategy on viral hepatitis  
98 (2016–2021) which envisioned a world where viral hepatitis transmission is halted and  
99 everyone living with viral hepatitis has access to safe, affordable and effective prevention, care  
100 and treatment services (1, 7). In response to the WHO recommendations and targets, the  
101 Ugandan Ministry of Health (MoH) called for increment in massive community awareness of  
102 HBV, screening and vaccination of all susceptible persons, improving the supply chain for  
103 HBV related commodities and supplies, attachment of patients to treatment care, and support  
104 programs, integration of services and resource mobilisation and equipping Healthcare  
105 practitioners (HCPs) with adequate knowledge on the management of HBV infection (MoH,  
106 2016b). More so, the government of Uganda allocated US\$2,847,000 in 2016 towards the  
107 procurement of vaccines, laboratory reagents, and anti-viral drugs for the prevention and  
108 treatment of Hepatitis B (16).

109 Hepatitis B vaccination in Uganda was introduced in 2002, implying that adults born before  
110 that year missed out on the routine vaccination given to newborns at 6, 10 and 14 weeks of age  
111 through the expanded programme on immunisation (17). Despite efforts to improve access to  
112 hepatitis B prevention, care and treatment services, their distribution in Wakiso district is  
113 unknown. (17). Our study sought to undertake a geospatial and descriptive analysis of hepatitis

114 B prevention services, vaccine doses, testing kits and trained personnel, as well as understand  
115 the relationship between healthcare facility (HCF) characteristics and availability of hepatitis  
116 B prevention services and supplies.

## 117 **Materials and methods**

### 118 **Study setting**

119 This study was conducted in Wakiso district, Central Uganda in July 2018. Wakiso District is  
120 located in the Central Region of Uganda and partly encircles Kampala, Uganda's capital.  
121 Wakiso District borders Mpigi, Luweero, Nakaseke and Mityana Districts in the North;  
122 Mukono in the East and Kalangala district to the South. It has a total of 7 health sub-districts  
123 namely; Busiro east, Busiro north, Busiro south, Kyadondo east, Kyadondo north, Kyadondo  
124 south, and Entebbe municipality. In 2014, Wakiso was estimated to have a population of  
125 1,997,418 people, of which 1,048,383 were females (18). The district has a total of 589 HCFs,  
126 among which 72 are owned and managed by the government (public), 477 are privately owned  
127 (private for-profit) and 40 are private not-for-profit (19). Based on the level of the HCFs, 234  
128 are private clinics, 153 are health centre IIs, 165 are health centre IIIs, 19 are health centre IVs,  
129 14 are hospitals, and 3 are specialised clinics. Wakiso is also home to the Entebbe regional  
130 referral hospital (19).

131

132 In terms of management of health services in Uganda, healthcare services in the district are  
133 overseen by the District Health Officer who is supported by two assistants. The district is  
134 further divided into health sub-districts, which are overseen by a management committee. The  
135 functions of the committee include monitoring the general administration of the health Sub-  
136 district on behalf of the district local council and MoH. Each of these committees has a health  
137 sub-district manager, often an in-charge at a health centre IV, whose role involves coordination,

138 planning, and budgeting for medical supplies and infrastructure, budget execution, and  
139 supervision of lower-level HCFs such as health centre IIIs and IIs (20).

140

#### 141 **Study design and data collection tools**

142 A cross-sectional study design was used to collect quantitative data from each of the study  
143 HCFs. A structured questionnaire was used to obtain data from the HCF managers. Where  
144 observations were required, questions prompting the researcher to make such observations  
145 were embedded in the data collection tool. The structured questionnaire was developed by the  
146 lead investigators (TS, JBI, and RKM) after a thorough review of literature pertaining provision  
147 of vaccination services (21, 22), and the service availability and readiness assessment (SARA)  
148 framework. The SARA framework is designed as a systematic survey to generate a set of core  
149 indicators of services, which can be used to measure progress in health system strengthening  
150 over time (23, 24). The study specifically focused on service availability, which is defined as  
151 the physical presence of the delivery of services, encompassing the health infrastructure, core  
152 health personnel, and service utilization (23, 24). The SARA is useful in the identification of  
153 the proportion of HCFs offering a particular intervention/service-in this case hepatitis B  
154 vaccination services, and whether the HCFs offering the service (HBV services) have the  
155 minimum standard in terms of equipment, trained staff and guidelines, diagnostic capacity, and  
156 medicines to provide an adequate level of service (service readiness) (23, 25). The data  
157 collection tool was reviewed and evaluated for face and internal validity by experts in viral  
158 hepatitis research, based at the Makerere University College of Health Sciences.

#### 159 **Study variables**

160 The validated tool captured data on the HCF characteristics such as level (categorised as  
161 hospital, health centre IVs, and IIIs), ownership (Private for-profit (PFP), Private not-for-profit  
162 (PNFP), and Public/government-owned), and location (rural/urban). Urban HCFs included



163 those administratively located in municipalities or town councils while rural HCFs were those  
164 located in a sub-county (26). Data were collected on the availability of vaccination and testing  
165 services, trained personnel, and vaccination storage equipment such as refrigerators. In  
166 addition, observations were made to ascertain the availability of hepatitis B testing kits, vaccine  
167 doses, infection prevention and control promotion materials, and disposal of medical wastes  
168 such as sharps.

### 169 **Sample size, sampling procedure, data collection procedures, and data analysis**

170 A total of 55 HCFs were surveyed. The sampling of the HCFs in the current study was  
171 purposive and has been detailed in our earlier publications (11, 27). Briefly, based on the  
172 national health facility inventory (19), we purposively selected 6 hospitals, 16 health centre  
173 IVs and 33 IIIs because these provided high-risk medical interventions such as blood  
174 transfusions, delivering higher numbers of mothers, and other surgical procedures that can  
175 elevate the risk of transmission of HBV (27, 28). Upon selection of the HCFs, data were  
176 collected using the Kobo Collect mobile application which was installed on Android-enabled  
177 mobile phones and tablets, and preloaded with the electronic version of the questionnaire.  
178 Research Assistants were required to upload the data onto a cloud server daily to avoid any risk  
179 of losing it. Upon completion of the survey, data were downloaded in the MS EXCEL format,  
180 checked for consistency, and cleaned. Afterwards, data were exported to STATA version 14.0  
181 for analysis. Cross tabulations based on the level of the HCF, ownership, and location were  
182 done and are presented in the current paper. The Chi square ( $\chi^2$ ) test was performed to establish  
183 the relationship between HCF characteristics and availability of hepatitis B related services and  
184 supplies.

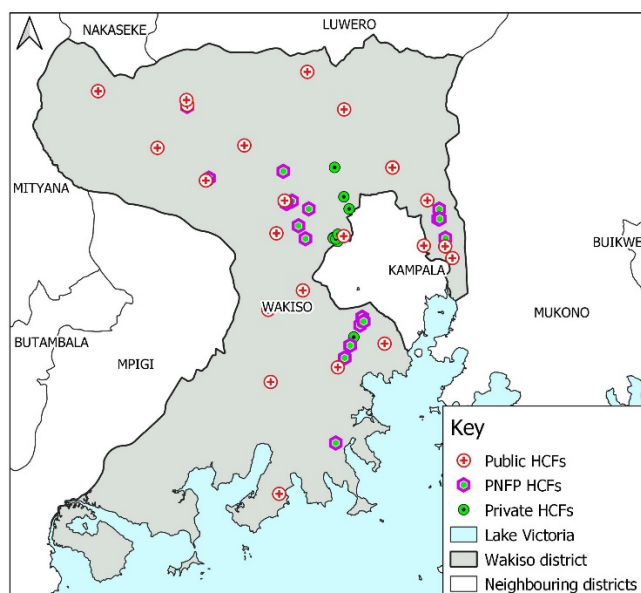

Figure 1: Map of Wakiso district showing the distribution of sampled healthcare facilities by ownership status

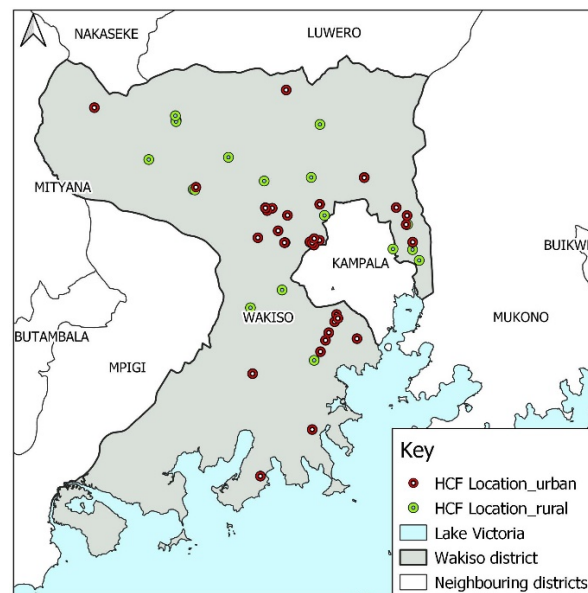

Figure 2: Map of Wakiso district showing the distribution of sampled healthcare facilities by location

185

## 186 Geospatial distribution of prevention services

187 The digital data collection tool which was used to gather data from HCFs also picked  
188 Geographical Positioning Systems (GPS) coordinates, i.e., northings and eastings. Location  
189 data were stored on the cloud server hosted by Kobo collect, together with attribute data about  
190 the HCFs. The data set was later downloaded as an excel file, checked for inconsistencies, and  
191 cleared of any errors. The data file was then saved as a comma delimited text file and imported  
192 as a layer into a GIS environment using ArcGIS (version 10.1). From the imported layer, a  
193 shapefile of point plots and corresponding attribute tables were generated. The point plots were  
194 overlaid onto administrative boundaries of Wakiso district and its environs, obtained from the  
195 Ugandan Bureau of Statistics (UBOS). Subsequently, shapefiles for different variables were  
196 generated depending on the research questions that needed explicit representation. Maps  
197 showing the geospatial distribution of different attributes such as availability of HBV, and  
198 routine vaccination schedule for health workers were generated and exported as a jpeg.

## 199 Quality control and quality assurance measures

200 Data were collected by 6 Research Assistants who were supervised by one of the lead  
201 investigators (TS). Before data collection, Research Assistants underwent a four days' training

202 to familiarise themselves with the data collection protocol. As part of the training, the data  
203 collection tools were pretested at two primary HCFs in peri-urban areas of Kampala City. The  
204 pre-test HCFs had comparable characteristics as those in the study district. These  
205 characteristics included conducting high-risk medical interventions such as conducting high  
206 volume deliveries, which increases occupational exposure to viral hepatitis.

## 207 **Ethics statement**

208 The study was approved by the Makerere University School of Public Health Higher Degrees  
209 Research and Ethics Committee. Administrative clearance was sought from the Wakiso district  
210 Local government and the management of the participating HCFs. Written informed consent  
211 was obtained from the study respondents before interviews or observations could happen. All  
212 informed consent discussions were done in English since all health workers were conversant  
213 with the language.

## 214 **Results**

### 215 **Background characteristics of health facilities**

216 Out of the 55 facilities visited, most 61.8% (34) were health centres IIIs and 47.3% (26) were  
217 privately owned. Most of the HCFs visited were located in the urban setting 65.4% (36/55) and  
218 Busiro North sub-district had the highest number 29.1% (16/55) of the facilities visited (Table  
219 1).

220 ***Table 1: Background characteristics of study healthcare facilities***

| <b>Variables</b>                | <b>Category</b>        | <b>Frequency (N=55)</b> | <b>Percentage (%)</b> |
|---------------------------------|------------------------|-------------------------|-----------------------|
| Level of health facility        | Health Centre III      | 34                      | 61.8                  |
|                                 | Health Centre IV       | 17                      | 30.9                  |
|                                 | Hospital               | 04                      | 7.3                   |
| Health facility Ownership       | Public                 | 23                      | 41.8                  |
|                                 | Private                | 26                      | 47.3                  |
|                                 | Private-not-for-profit | 06                      | 10.9                  |
| Location of the facility        | Urban                  | 36                      | 65.4                  |
|                                 | Rural                  | 19                      | 34.6                  |
| Name of the Health sub-district | Busiro North           | 16                      | 29.1                  |
|                                 | Busiro East            | 7                       | 12.7                  |
|                                 | Busiro south           | 5                       | 9.1                   |

|  |                      |    |      |
|--|----------------------|----|------|
|  | Kyadondo North       | 10 | 18.2 |
|  | Kyadondo south       | 06 | 10.9 |
|  | Kyadondo East        | 10 | 18.2 |
|  | Entebbe municipality | 01 | 1.8  |

221

222 **Availability and distribution of Hepatitis B vaccine doses,testing kits and trained**  
223 **personnel**

224 Only 29% (16) of the 55 HCFs reported having received hepatitis B vaccine doses in the last  
225 12 months. At the time of the study, the hepatitis B vaccine was available in only 27.3 %  
226 (15/55) of the facilities; mostly in HC IVs 52.9% (9/17) and lowest in HC IIIs 11.8% (4/34).  
227 More urban HCFs, 93.3% (14/15) had hepatitis B vaccine available at the time of the study  
228 than rural ones 6.7% (1/14). Most HCFs 60.0% (33/55) had testing kits among which all  
229 hospitals and PNFP facilities had hepatitis B testing kits at their facilities. More urban HCFs,  
230 72.2% (26/36) had testing kits than rural ones 36.8% (7/19). Although 30.9% (17/55) of the  
231 HCFs had personnel trained on Hepatitis B management; only 1 hospital 25.0% (1/4) and 3  
232 13.0% (3/23) public facilities had their personnel trained on hepatitis B management. Infection  
233 control promotion materials were found in 89.1% (49/55) of the facilities; 91.2% (31/34) in  
234 HC IIIs, 82.4% (14/17) in HCIV and all hospitals. Nearly three quarters 65.6% (36/55) of the  
235 HCFs had post-exposure prophylaxis (PEP) guidelines in case of accidental injuries; this was  
236 lowest in public facilities 65.2% (15/23). Almost all facilities 96.4% (53/55) had handwashing  
237 facilities (Table2).

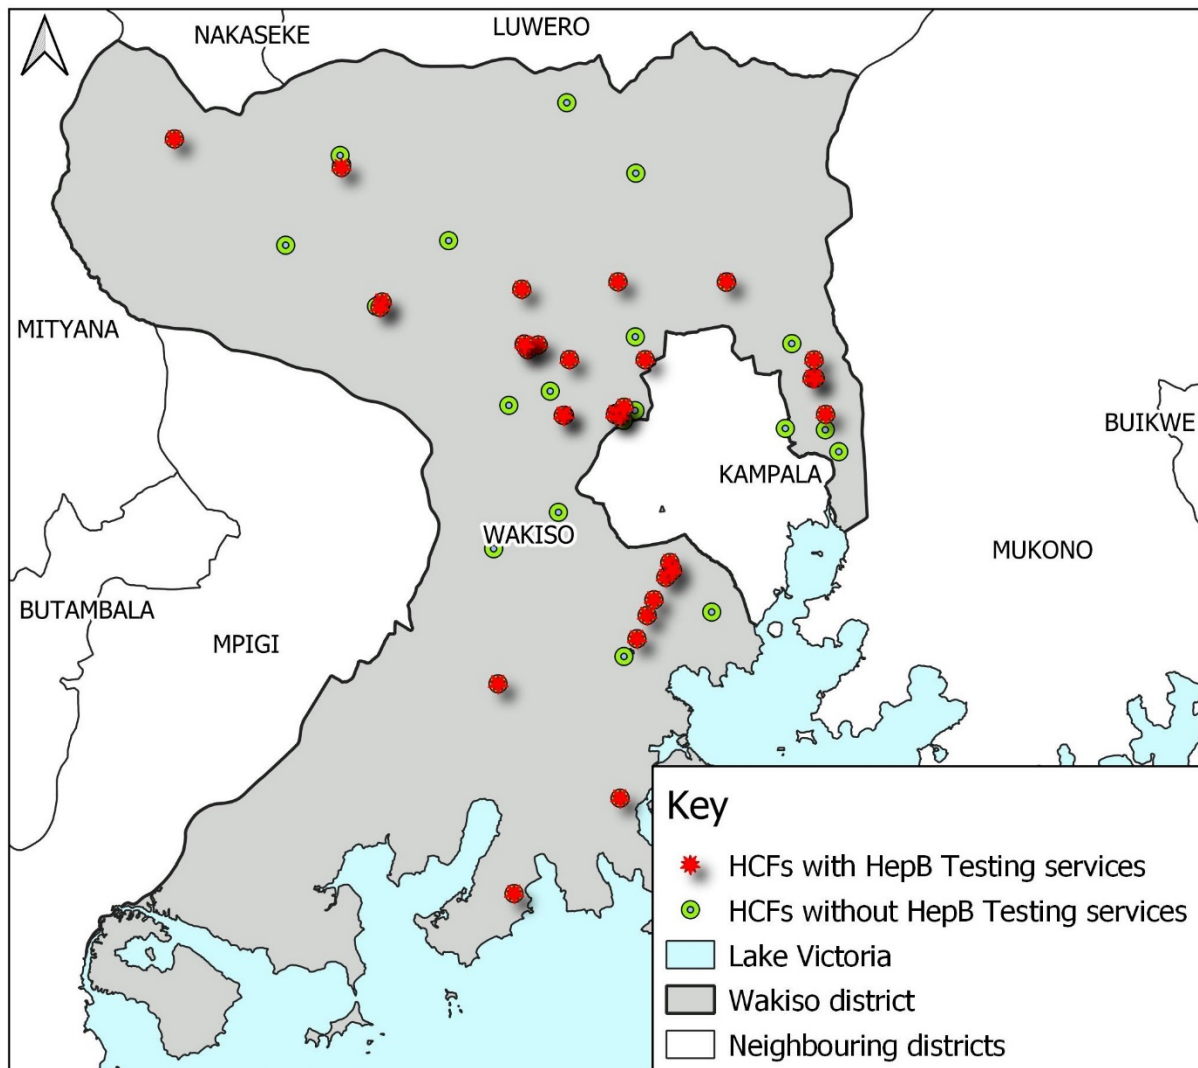

238  
239  
240

*Figure 3: A map of Wakiso district showing the distribution of healthcare facilities that offer hepatitis B testing services*

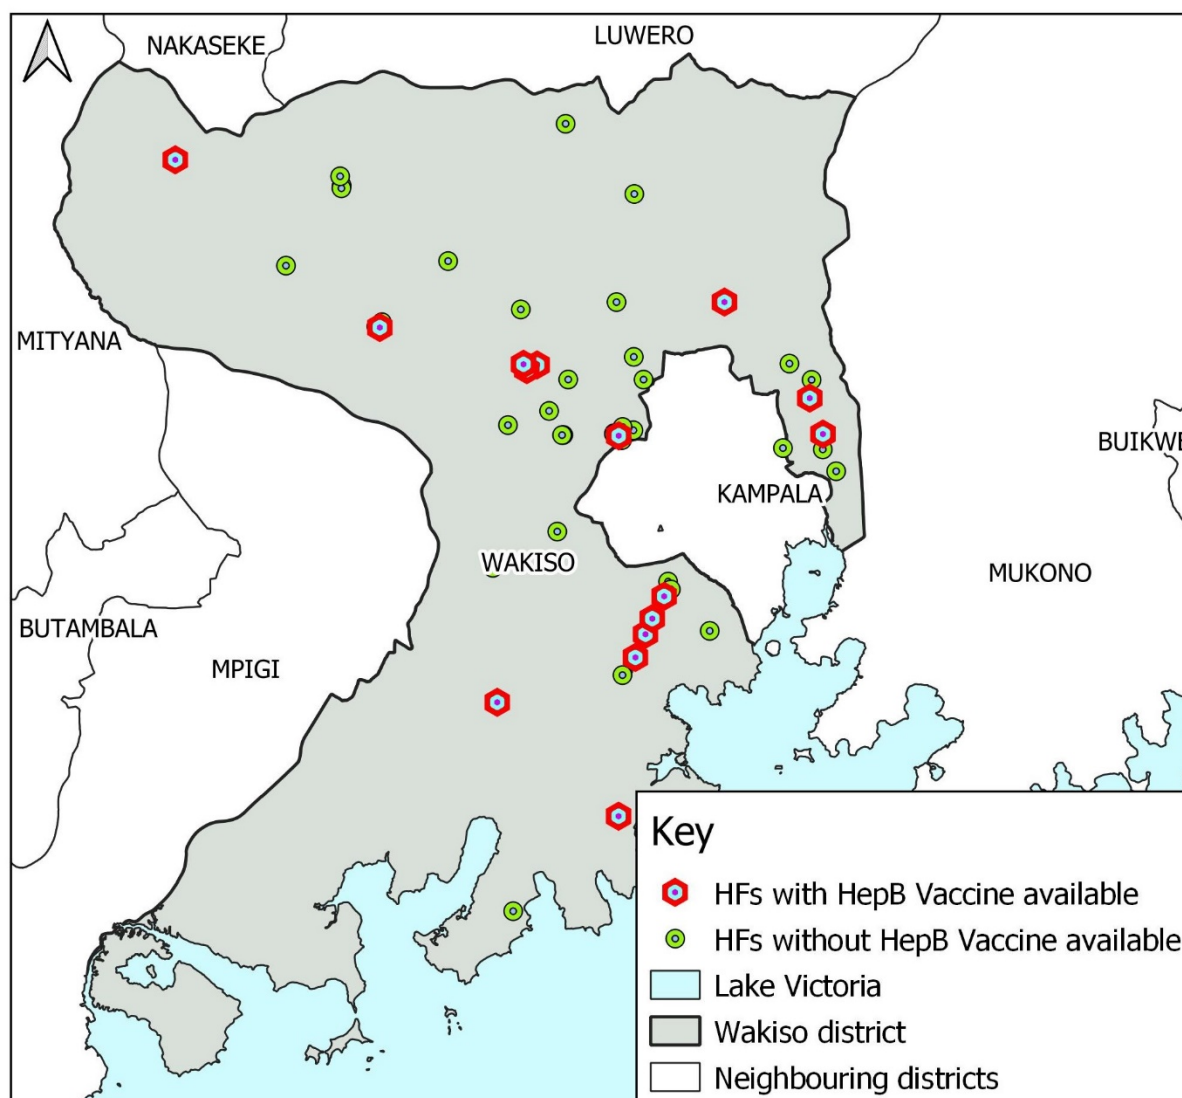

242  
243 *Figure 4: A map showing healthcare facilities with the hepatitis B vaccine in Wakiso*  
244 *district, Uganda*

245  
246 **Availability and distribution of routine vaccination services for healthcare providers**

247 Only 29.1% (16/55) of the HCFs surveyed had a routine vaccination schedule for the health  
248 care providers. The majority of the HCFs that had a routine vaccination schedule were clustered  
249 in the same area, with just a few dispersed outwards (Figure 1). The majority of the HCFs were  
250 also located just adjacent to Kampala, Uganda's Capital with more than half, 62.5% (10/16) in  
251 the urban areas and over a third, 37.5% (6/16) in the rural areas.



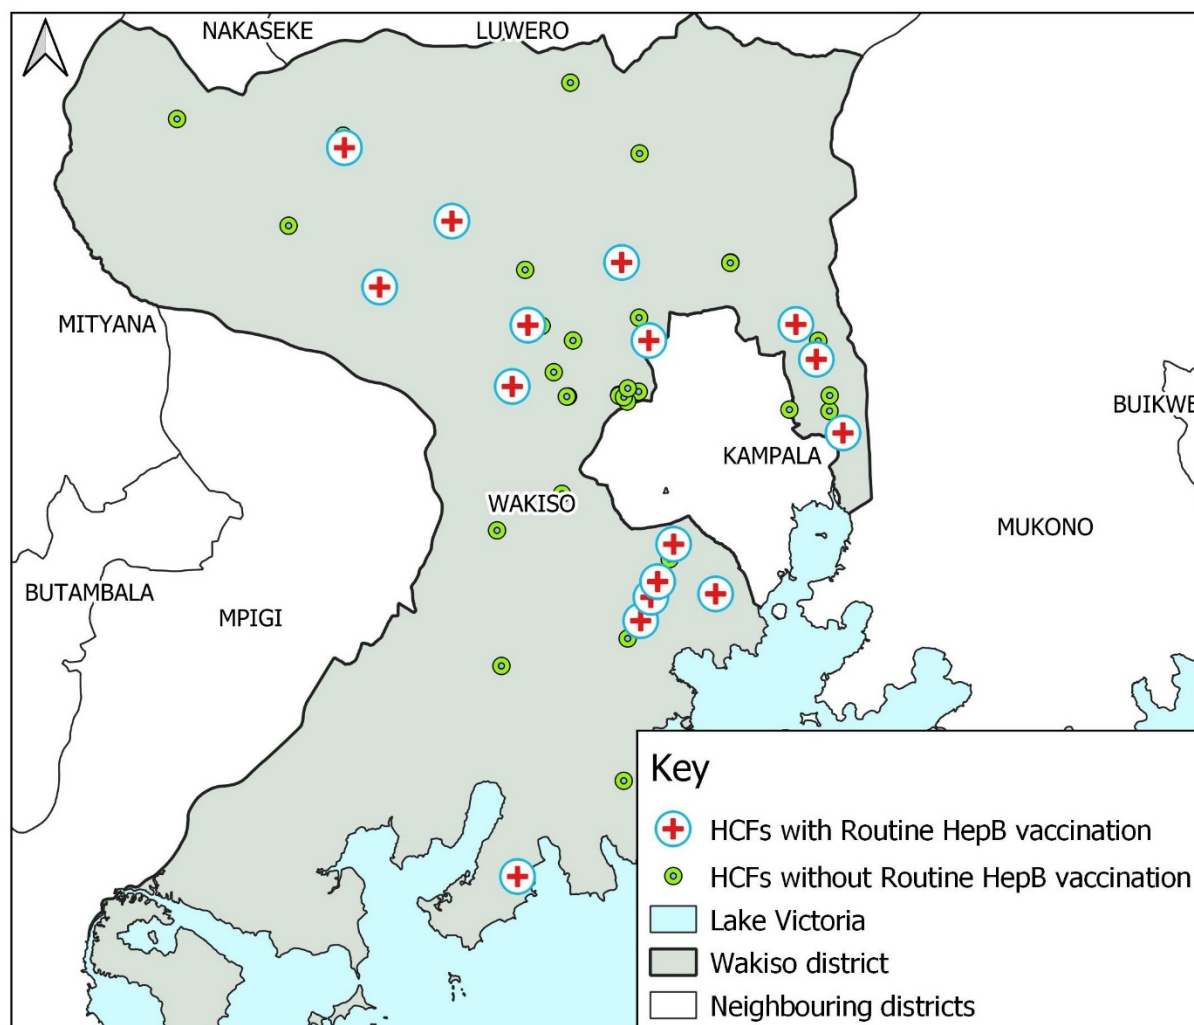

252  
253  
254  
255

*Figure 5: A map of Wakiso district showing healthcare facilities with a routine vaccination schedule (as either static or outreach) for healthcare providers and other high-risk groups*

256 **Relationship between healthcare facility characteristics and availability of hepatitis B**  
257 **prevention services and supplies**

258 There was a statistically significant association between level of HCF and receiving hepatitis  
259 B vaccine doses in the last 12 months ( $p \leq 0.001$ ), having Hepatitis B vaccines at the time of  
260 the survey ( $p = 0.002$ ), availability of hepatitis B testing services ( $p = 0.031$ ), having hepatitis B  
261 testing kits in stock ( $p = 0.013$ ), having reminders and/or job aids that promote the reduction and  
262 use of injections, safe administration of injections, or safe disposal of used injection equipment  
263 available at this facility ( $p = 0.003$ ) and having color-coded waste bins to promote safe waste  
264 management ( $p = 0.043$ ) (Table 2).

265 There was a statistically significant association between ownership of the HCF and availability  
266 of guidelines to follow in case healthcare providers are exposed to the hepatitis B infection  
267 ( $p \leq 0.001$ ), availability of hepatitis B testing services ( $p \leq 0.001$ ), availability of hepatitis B  
268 testing kits ( $p \leq 0.001$ ), poor management of infectious waste ( $p = 0.007$ ), and having someone  
269 trained in the management of hepatitis B ( $p = 0.049$ ).

270 The location of HCF was associated with receiving hepatitis B vaccine doses in the last 12  
271 months ( $p = 0.030$ ), and availability of Hepatitis B vaccines ( $p = 0.010$ ), testing services  
272 ( $p = 0.010$ ) and Hepatitis B testing kits ( $p = 0.004$ ). The location of the HCF was also associated  
273 with availability of guidelines to follow in case healthcare providers are exposed to the  
274 hepatitis B infection ( $p = 0.040$ ) and presence of staff trained in hepatitis B testing ( $p = 0.050$ ).

275



276 Table 2: *Availability of hepatitis B prevention services in Wakiso district, Central Uganda, stratified by level of the healthcare facility,*  
 277 *ownership, and location*

| Indicator                                                                                                                                                                                        | (N=55)<br>(%) | Health facility level N (%) |                  |                     | $\chi^2$<br>p-<br>value | Ownership N (%)     |                 |                    | $\chi^2$<br>p-<br>value | Location N (%)    |                   | $\chi^2$<br>p-<br>value |
|--------------------------------------------------------------------------------------------------------------------------------------------------------------------------------------------------|---------------|-----------------------------|------------------|---------------------|-------------------------|---------------------|-----------------|--------------------|-------------------------|-------------------|-------------------|-------------------------|
|                                                                                                                                                                                                  |               | HCIH<br>(N = 34)            | HCIV<br>(N = 17) | Hospital<br>(N = 4) |                         | Private<br>(N = 26) | PNFP<br>(N = 6) | Public<br>(N = 23) |                         | Rural<br>(N = 19) | Urban<br>(N = 36) |                         |
| HCF received Hep B vaccine doses in the last 12 months                                                                                                                                           | 16 (29.1)     | 03 (8.8)                    | 10 (58.8)        | 03 (75.0)           | <b>≤0.001</b>           | 10 (38.5)           | 02 (33.3)       | 4 (17.4)           | 0.261                   | 2 (10.5)          | 14 (38.9)         | <b>0.030</b>            |
| HCF has functional refrigerators for storing Hepatitis B vaccines                                                                                                                                | 49 (89.1)     | 28 (82.4)                   | 17 (100)         | 04 (100)            | 0.125                   | 23 (88.5)           | 04 (66.7)       | 22 (95.7)          | 0.127                   | 16 (84.2)         | 33 (91.7)         | 0.399                   |
| HCF has cold chain technicians                                                                                                                                                                   | 19 (34.6)     | 08 (23.5)                   | 09 (52.9)        | 02 (50.0)           | 0.052                   | 09 (34.6)           | 02 (33.3)       | 08 (34.8)          | 0.998                   | 04 (21.1)         | 15 (41.7)         | 0.126                   |
| Cold chain technician (s) at the HCF were trained in temperature monitoring                                                                                                                      | 14 (25.4)     | 07 (20.5)                   | 06 (35.2)        | 01 (25.0)           | 0.502                   | 07 (26.9)           | 02 (33.3)       | 05 (21.7)          | 0.520                   | 04 (21.1)         | 10 (27.7)         | 0.179                   |
| HCF had Hepatitis B vaccines at the time of the survey                                                                                                                                           | 15 (27.3)     | 04 (11.8)                   | 09 (52.9)        | 02 (50.0)           | <b>0.002</b>            | 10 (38.5)           | 02 (33.3)       | 03 (13.0)          | 0.129                   | 01 (5.3)          | 14 (38.9)         | <b>0.010</b>            |
| HCF has guidelines to follow in case healthcare providers are exposed to the hepatitis B infection                                                                                               | 25 (45.6)     | 14 (41.2)                   | 08 (47.1)        | 03 (75.0)           | 0.432                   | 17 (65.4)           | 06 (100)        | 02 (8.7)           | <b>≤0.001</b>           | 05 (26.3)         | 20 (55.6)         | <b>0.040</b>            |
| Hepatitis B testing services are available at the HCF                                                                                                                                            | 33 (60.0)     | 16 (47.1)                   | 13 (76.5)        | 04 (100)            | <b>0.031</b>            | 23 (88.5)           | 06 (100)        | 04 (17.4)          | <b>≤0.001</b>           | 07 (36.8)         | 26 (72.2)         | <b>0.010</b>            |
| HCF has Hepatitis B testing kits in stock at the time of the survey                                                                                                                              | 29 (52.7)     | 13 (38.2)                   | 12 (70.6)        | 04 (100)            | <b>0.013</b>            | 21 (80.8)           | 05 (83.3)       | 03 (13.0)          | <b>≤0.001</b>           | 05 (26.3)         | 24 (66.7)         | <b>0.004</b>            |
| HCF has a routine vaccination schedule for health care providers and other target groups                                                                                                         | 16 (29.1)     | 08 (23.5)                   | 05 (29.4)        | 03 (75.0)           | 0.101                   | 07 (26.9)           | 02 (33.3)       | 07 (30.4)          | 0.936                   | 06 (31.6)         | 10 (27.8)         | 0.768                   |
| HCF has any infection prevention and control promotion materials                                                                                                                                 | 49 (89.1)     | 31 (91.2)                   | 14 (82.4)        | 04 (100)            | 0.488                   | 25 (96.2)           | 05 (83.3)       | 19 (82.6)          | 0.282                   | 16 (84.2)         | 33 (91.7)         | 0.399                   |
| HCF has reminders and/or job aids posted that promote reducing the use of injections, safe administration of injections, or safe disposal of used injection equipment available at this facility | 44 (80.0)     | 31 (91.2)                   | 10 (58.8)        | 03 (75.0)           | <b>0.003</b>            | 21 (80.8)           | 06 (100)        | 17 (73.9)          | 0.360                   | 17 (89.5)         | 27(75.0)          | 0.202                   |

|                                                                         |           |           |           |           |              |           |           |           |              |           |           |              |
|-------------------------------------------------------------------------|-----------|-----------|-----------|-----------|--------------|-----------|-----------|-----------|--------------|-----------|-----------|--------------|
| HCF holds continuous medical education (CMEs) on hepatitis B prevention | 16 (29.1) | 08 (23.5) | 07 (41.2) | 01 (25.0) | 0.418        | 08 (30.8) | 02 (33.3) | 06 (26.1) | 0.910        | 06 (31.6) | 10 (27.8) | 0.768        |
| HCF has color-coded waste bins to promote safe waste management         | 48 (87.3) | 32 (94.1) | 12 (70.6) | 04 (100)  | <b>0.043</b> | 22 (84.6) | 06 (100)  | 20 (89.6) | 0.594        | 18 (94.7) | 30 (83.3) | 0.228        |
| HCF has poorly managed infectious waste                                 | 24 (43.6) | 12 (35.3) | 10 (58.8) | 02 (50.0) | 0.270        | 09 (34.6) | 0 (0.0)   | 15 (65.2) | <b>0.007</b> | 09 (47.4) | 15 (41.7) | 0.685        |
| HCF has staff trained in hepatitis B testing                            | 43 (78.2) | 25 (73.5) | 14 (82.4) | 04 (100)  | 0.423        | 22 (84.6) | 06 (100)  | 15 (65.2) | 0.100        | 12 (63.2) | 31 (86.1) | <b>0.050</b> |
| HCF has someone trained in the management of hepatitis B                | 17 (30.9) | 09 (26.5) | 07 (41.2) | 01 (25.0) | 0.544        | 11 (42.3) | 03 (50.0) | 03 (13.0) | <b>0.049</b> | 05 (26.3) | 12 (33.3) | 0.592        |
| HCF has an infection prevention and control focal person/ committee     | 20 (36.4) | 12 (35.3) | 05 (29.4) | 03 (75.0) | 0.229        | 07 (26.9) | 04 (66.7) | 09 (39.1) | 0.177        | 05 (26.3) | 15 (41.7) | 0.260        |
| HCF has post-exposure prophylaxis guidelines in case of injuries        | 36 (65.6) | 23 (67.7) | 09 (52.9) | 04 (100)  | 0.186        | 16 (61.5) | 05 (83.3) | 15 (65.2) | 0.599        | 13 (68.4) | 23 (63.9) | 0.737        |
| HCF has handwashing facilities with soap                                | 46 (83.6) | 30 (88.2) | 12 (70.5) | 04 (100)  | 0.098        | 26 (100)  | 06 (100)  | 14 (60.8) | 0.236        | 15 (78.9) | 31 (86.1) | 295          |

278

279

280

281

282

283

284

285

## 286 **Discussion**

287 The main aim of this study was to assess the availability and geospatial distribution of Hepatitis  
288 B prevention services in Wakiso District, Central Uganda. This is important since it unmask  
289 variation in service availability across a geographic space. Our analysis found that only 29%  
290 of the HCFs had hepatitis B vaccine supplies in the last 12 months, but the vaccine was  
291 available in only 27.3 % of the HCFs at the time of the survey. We established that less than  
292 half of the HCFs had infection prevention and control (IPC) guidelines to follow when exposed  
293 to HBV infections, and only two-thirds of the HCFs had PEP guidelines in case of injuries.  
294 Geospatial analysis indicated that the majority of the HCFs offering routine HBV vaccination  
295 were clustered in the same area, with just a few dispersed outwards. Hepatitis B vaccination  
296 and testing services were mainly offered by health centre IVs and hospitals.

297 Analysis of the geospatial distribution of hepatitis B prevention services such as vaccination,  
298 screening, and testing, revealed that HCFs offering such services conformed to a nucleated  
299 pattern. HCFs were located close to each other. Many of these HCFs were located close to  
300 Kampala, Uganda's capital, and in municipalities and major town councils. The location or  
301 proximity of HCFs providing Hepatitis B prevention services to the more urbanised areas is  
302 not surprising. Urbanised areas are more likely to have a higher demand for services compared  
303 to the less urbanised or rural settings. There is also evidence that urban dwellers are more likely  
304 to be knowledgeable about their health, and thus can demand services. However, this has  
305 implications for hepatitis B prevention. It is known that rural dwellers in Uganda have lower  
306 incomes compared to urban dwellers (29, 30). Therefore, the unequal distribution of hepatitis  
307 B prevention services is likely to limit their uptake.

308 Our study revealed that only 29% of the HCFs reported having hepatitis B vaccine doses in  
309 stock in the last 12 months. Our findings indicate that less than a third of the HCFs had hepatitis

310 B vaccines in stock during the study period (2019). The low proportion of HCFs with hepatitis  
311 B vaccine doses in stock during the study period may have been attributed to the low prevalence  
312 of the disease in the region. The central region, where Wakiso district is located had a lower  
313 prevalence (1.6%) of hepatitis B compared to other regions (4.6% in mid-north, 3.8% in West  
314 Nile, 4.4% in northeast among other regions) (31, 32). Due to the low prevalence of hepatitis  
315 B in the central region, Wakiso district was in 2015 not prioritised by the Ugandan Ministry of  
316 Health for mass hepatitis B prevention services including screening, vaccination of adults, and  
317 testing (32). The low prevalence and consequently low prioritisation of hepatitis B prevention  
318 services by the Ugandan Ministry of Health may have driven the availability and distribution  
319 of hepatitis B services in HCFs in Wakiso district. Besides, the low demand for hepatitis B  
320 prevention services, which resulted from limited knowledge and a negative attitude towards  
321 hepatitis B prevention among healthcare providers in Wakiso district, as earlier reported by  
322 Ssekamatte, Isunju (27) could also explain the limited coverage in HCFs. The study reported  
323 that 42.2% of healthcare providers exhibited poor knowledge of HBV infection transmission  
324 and prevention, 41.8% had a negative attitude while 41.5% exhibited poor hepatitis B  
325 prevention practices. There is evidence that unfavourable knowledge, attitude, and practices  
326 can affect the demand and supply of healthcare services (33).

327 A higher proportion of PNFP and private HCFs had hepatitis B prevention services such as  
328 screening and testing compared to the public HCFs. This is not surprising given the fact that  
329 procurement of the vaccine greatly depended on the demand, and that the vaccine was paid for  
330 by the clients. Therefore, the provision of hepatitis B vaccination services such as testing and  
331 vaccination was seen as a business from which PNFP and private HCFs would make profits.  
332 There is evidence of HCFs providing services only if they can make a profit (34). The low  
333 proportion of public HCFs reporting having hepatitis B vaccines in stock in the last 12 months  
334 could be attributed to the fact that Wakiso district was not in a high-burden region, and thus,

335 not prioritised. The Ugandan Ministry of Health rolled out free vaccinations in the country  
336 starting with regions of high prevalence that did not include Wakiso district. Thus  
337 public/government HCFs in low burden areas did not have the vaccine readily available (32).

338 Less than half of the HCFs in our study setting had guidelines patients and healthcare providers  
339 could follow when exposed to the hepatitis B virus. In addition, about two-thirds of the HCFs  
340 had PEP guidelines in case of injuries. The low proportion of HCFs with infection prevention  
341 and control guidelines could have been due to the limited investment in hepatitis B prevention  
342 and control to support development and distributribution of guidelines, policies and standards  
343 to HCFs. Limited funding is widely reported to impact the provision of healthcare services,  
344 and the development and implementation of guidelines and policies (35).

345 Less than a third of the study HCF held continuing medical education sessions(CMEs) on  
346 hepatitis B prevention. The CMEs helps healthcare providers to maintain, develop, or increase  
347 the knowledge and skills about the provision of healthcare. This is a considerably low  
348 proportion given the public health importance of hepatitis B. The low proportion of HCFs  
349 holding CMEs may have resulted from the fact that less than a third of the HCF had a healthcare  
350 provider trained in the management of hepatitis B, despite more than three quarters being  
351 trained in hepatitis B testing. The fact that only a few HCFs had healthcare providers trained  
352 in hepatitis B management indicates a knowledge gap among healthcare providers in HCFs in  
353 Wakiso district. Therefore, our study recommends the need to train healthcare providers,  
354 particularly those in health centre IIIs and public HCFs, irrespective of the location of HCF.

### 355 **Conclusions**

356 Our study revealed an uneven distribution of hepatitis B services. The majority of the hepatitis  
357 B services were clustered around major towns, municipalities, and Kampala City, with just a  
358 few sparsely located in rural areas. Regarding the availability of hepatitis B prevention services,

359 less than a third of the HCFs had hepatitis B vaccine doses in stock in the last 12 months, less  
360 than a third had a routine vaccination schedule for the health care providers while slightly more  
361 than half offered hepatitis B testing services. The proportion of HCFs offering hepatitis B  
362 services was higher among urban HCFs, private HCFs, and hospitals. This calls a extension of  
363 hepatitis B prevention services to rural, public and PNFP healthcare facilities.

#### 364 **Declarations**

365 Consent for publication: Not Applicable

#### 366 **Availability of data and material**

367 All relevant data are within the paper and its Supporting Information files.

#### 368 **Competing interests**

369 The authors declare that they have no competing interests.

#### 370 **Funding**

371 No funding source to declare.

#### 372 **Authors' contributions**

373 TS, JBI and RKM were involved in the conceptualisation of the study, design, data analysis,  
374 and drafting of the manuscript. AN STW, RN, ND, MN, JN, WKK and JNB participated in  
375 data analysis, interpretation of findings and drafting of the manuscript. All authors read and  
376 approved the final manuscript. JBI drew the maps presented in the manuscript.

#### 377 **Acknowledgements**

378 We thank the Wakiso District Health office for granting the study team administrative  
379 clearance during the survey. Our sincere thanks also go to the management/administration of  
380 the different healthcare facilities, without whom, this study would not have been accomplished.

381 Finally, we appreciate the research assistants for their role in undertaking the survey from  
382 which the current manuscript has been written.

383

## 384 **References**

- 385 1. WHO. Global hepatitis report 2017: World Health Organization; 2017.
- 386 2. Le MH, Yeo YH, So S, Gane E, Cheung RC, Nguyen MH. Prevalence of hepatitis B vaccination  
387 coverage and serologic evidence of immunity among US-born children and adolescents from 1999 to  
388 2016. *JAMA network open*. 2020;3(11):e2022388-e.
- 389 3. MoH MoH. Uganda population-based HIV impact assessment (UPHIA) 2016-2017.  
390 Kampala2017.
- 391 4. WHO. Guidelines on hepatitis B and C testing: policy brief. World Health Organization; 2016.
- 392 5. WHO. WHO Guidelines on Hepatitis B and C Testing. Geneva: World Health Organization;  
393 2017. Licence: CC BY-NC-SA 3.0 IGO. 2018.
- 394 6. Ray G. Current scenario of hepatitis B and its treatment in India. *Journal of clinical and*  
395 *translational hepatology*. 2017;5(3):277.
- 396 7. WHO. Global health sector strategy on viral hepatitis 2016-2021. Towards ending viral  
397 hepatitis. World Health Organization; 2016.
- 398 8. Negro F. Hepatitis D virus coinfection and superinfection. *Cold Spring Harbor perspectives in*  
399 *medicine*. 2014;4(11):a021550.
- 400 9. Akande KO, Fowotade A, Adekanmbi O. The effect of Hepatitis D co-infection on the  
401 immunologic and molecular profile of Hepatitis B in asymptomatic Chronic Hepatitis B patients in  
402 southwest Nigeria. *Journal of Immunoassay and Immunochemistry*. 2020;41(3):272-80.
- 403 10. Hung M, Williams W, Lu P, Woods L, Koppaka R, Lindley M. Vaccination coverage among  
404 adults in the United States, national health interview survey, 2017. Centers for Disease Control and  
405 Prevention. 2018.
- 406 11. Ssekamatte T, Mukama T, Kibira SP, Ndejjo R, Bukenya JN, Kimoga ZPA, et al. Hepatitis B  
407 screening and vaccination status of healthcare providers in Wakiso district, Uganda. *PLoS One*.  
408 2020;15(7):e0235470.
- 409 12. Ocan M, Acheng F, Otike C, Beinomugisha J, Katete D, Obua C. Antibody levels and  
410 protection after Hepatitis B vaccine in adult vaccinated healthcare workers in northern Uganda. *Plos*  
411 *one*. 2022;17(1):e0262126.
- 412 13. Awoke N, Mulgeta H, Lolaso T, Tekalign T, Samuel S, Obsa MS, et al. Full-dose hepatitis B  
413 virus vaccination coverage and associated factors among health care workers in Ethiopia: A  
414 systematic review and meta-analysis. *PLoS One*. 2020;15(10):e0241226.
- 415 14. Aaron D, Nagu TJ, Rwegasha J, Komba E. Hepatitis B vaccination coverage among healthcare  
416 workers at national hospital in Tanzania: how much, who and why? *BMC infectious diseases*.  
417 2017;17(1):1-7.
- 418 15. Sonderup MW, Spearman CW. Global Disparities in Hepatitis B Elimination—A Focus on  
419 Africa. *Viruses*. 2022;14(1):82.
- 420 16. Press statement by the Minister of Health of the Republic of Uganda [press release].  
421 Kampala2016.
- 422 17. Bwogi J, Braka F, Makumbi I, Mishra V, Bakamutumaho B, Nanyunja M, et al. Hepatitis B  
423 infection is highly endemic in Uganda: findings from a national serosurvey. *African health sciences*.  
424 2009;9(2).
- 425 18. UBOS. The National Population and Housing Census 2014 – Area  
426 Specific Profile Series, Kampala, Uganda. 2017 [Available from: [https://www.ubos.org/wp-](https://www.ubos.org/wp-content/uploads/publications/2014CensusProfiles/WAKISO.pdf)  
427 [content/uploads/publications/2014CensusProfiles/WAKISO.pdf](https://www.ubos.org/wp-content/uploads/publications/2014CensusProfiles/WAKISO.pdf).  
428 19. Ministry of Health. National health facility master facility list 2018 Kampala, Uganda:  
429 Ministry of Health; 2018 [cited 2021 2021]. Available from:  
430 [http://library.health.go.ug/publications/health-facility-inventory/national-health-facility-master-](http://library.health.go.ug/publications/health-facility-inventory/national-health-facility-master-facility-list-2018)  
431 [facility-list-2018](http://library.health.go.ug/publications/health-facility-inventory/national-health-facility-master-facility-list-2018).  
432 20. Ministry of Health. Guidelines on establishment of health sub-districts management  
433 committee Kampala, Uganda: Ministry of Health; 2010 [cited 2021 14-06-2021]. Available from:



- 434 [http://library.health.go.ug/publications/health-centres-iv-iii-and-ii/guidelines-establishment-health-](http://library.health.go.ug/publications/health-centres-iv-iii-and-ii/guidelines-establishment-health-sub-districts-management)  
435 [sub-districts-management](http://library.health.go.ug/publications/health-centres-iv-iii-and-ii/guidelines-establishment-health-sub-districts-management).
- 436 21. Wang S, Smith H, Peng Z, Xu B, Wang W. Increasing coverage of hepatitis B vaccination in  
437 China: a systematic review of interventions and implementation experiences. *Medicine*. 2016;95(19).
- 438 22. Malewezi B, Omer SB, Mwangomba B, Araru T. Protecting health workers from nosocomial  
439 Hepatitis B infections: A review of strategies and challenges for implementation of Hepatitis B  
440 vaccination among health workers in Sub-Saharan Africa. *Journal of epidemiology and global health*.  
441 2016;6(4):229-41.
- 442 23. WHO. Service availability and readiness assessment (SARA): an annual monitoring system for  
443 service delivery: reference manual. World Health Organization; 2013.
- 444 24. Data for Impact. Service Availability and Readiness Assessment (SARA) 2021 [cited 2021 14-  
445 06-2021]. Available from: [https://www.data4impactproject.org/prh/service-delivery/access-to-](https://www.data4impactproject.org/prh/service-delivery/access-to-sexual-and-reproductive-health-services/service-availability-and-readiness-assessment-sara/)  
446 [sexual-and-reproductive-health-services/service-availability-and-readiness-assessment-sara/](https://www.data4impactproject.org/prh/service-delivery/access-to-sexual-and-reproductive-health-services/service-availability-and-readiness-assessment-sara/).
- 447 25. Ministry of Health. Uganda Services Availability and Readiness Assessment 2013. Summary  
448 Report:Key findings in figures Kampala, Uganda: Ministry of Health; 2013 [Available from:  
449 [http://library.health.go.ug/publications/quality-assurance-quality-improvement/uganda-services-](http://library.health.go.ug/publications/quality-assurance-quality-improvement/uganda-services-availability-and-readiness)  
450 [availability-and-readiness](http://library.health.go.ug/publications/quality-assurance-quality-improvement/uganda-services-availability-and-readiness).
- 451 26. Government of Uganda. THE PHYSICAL PLANNING ACT, 2010. Kampala, Uganda2020  
452 [Available from: [https://www.kcca.go.ug/uploads/acts/Physical\\_Planning\\_Act\\_2010.pdf](https://www.kcca.go.ug/uploads/acts/Physical_Planning_Act_2010.pdf).
- 453 27. Ssekamatte T, Isunju JB, Zirimala PAK, Etajak S, Kamukama S, Seviiri M, et al. A positive  
454 attitude among primary healthcare providers predicts better hepatitis B prevention practices:  
455 evidence from a cross-sectional survey in Wakiso district, Central Uganda. *Health Psychology and*  
456 *Behavioral Medicine*. 2021;9(1):298-314.
- 457 28. Ssekamatte T, Mukama T, Kibira SPS, Ndejjo R, Bukenya JN, Kimoga ZPA, et al. Hepatitis B  
458 screening and vaccination status of healthcare providers in Wakiso district, Uganda. *PLOS ONE*.  
459 2020;15(7):e0235470.
- 460 29. Okurut FN, Odwee JJ, Adebua A. Determinants of regional poverty in Uganda. 2002.
- 461 30. World bank. The Uganda Poverty Assessment Report 2016. Farms, cities and good fortune:  
462 Assessing poverty reduction in Uganda from 2006 to 2013. 2016.
- 463 31. Ministry of Health. Uganda Population-based HIV Impact Assessment (UPHIA) 2016-2017:  
464 Final  
465 Report. Kampala: Ministry of Health 2019 [Available from: [https://phia.icap.columbia.edu/wp-](https://phia.icap.columbia.edu/wp-content/uploads/2019/07/UPHIA_Final_Report_Revise_07.11.2019_Final_for-web.pdf)  
466 [content/uploads/2019/07/UPHIA\\_Final\\_Report\\_Revise\\_07.11.2019\\_Final\\_for-web.pdf](https://phia.icap.columbia.edu/wp-content/uploads/2019/07/UPHIA_Final_Report_Revise_07.11.2019_Final_for-web.pdf).
- 467 32. Ministry of Health. UGANDA COMMENDED FOR EFFORTS IN THE FIGHT AGAINST HEPATITIS  
468 B. Kampala: Ministry of Health; 2018 [Available from:  
469 [https://www.health.go.ug/2019/12/02/uganda-commended-for-efforts-in-the-fight-against-](https://www.health.go.ug/2019/12/02/uganda-commended-for-efforts-in-the-fight-against-hepatitis-b/)  
470 [hepatitis-b/](https://www.health.go.ug/2019/12/02/uganda-commended-for-efforts-in-the-fight-against-hepatitis-b/).
- 471 33. Boulding KE. The concept of need for health services. *The Milbank Memorial Fund Quarterly*.  
472 1966;44(4):202-23.
- 473 34. Tetui M, Ssekamatte T, Akilimali P, Sirike J, Fonseca-Rodríguez O, Atuyambe L, et al.  
474 Geospatial Distribution of Family Planning Services in Kira Municipality, Wakiso District, Uganda.  
475 *Frontiers in Global Women's Health*. 2021;1(28).
- 476 35. Mordasini M. Implementing Global Public Policies: Are the Aid Agencies Walking the Talk?  
477 *International Development Policy| Revue internationale de politique de développement*. 2012(3).

478
